# Supplementary material for: Myco-synthesis of multi-twinned silver nanoparticles as potential antibacterial and antimalarial agents
Source: Royal Society of Chemistry journal article supplement (doi:10.1039/d3ra07752g), 2024-01-01
Supplement: d3ra07752g1.pdf [file d3ra07752g1.pdf]

## **Electronic Supplementary Information**

### **Myco-synthesis of Multi-Twinned Silver Nanoparticles as Potential Antibacterial and Antimalarial Agents**

*Suresh kumar,<sup>1</sup> Megha Pant,<sup>1</sup> Cherish Prashar,<sup>2,3</sup> Kailash C. Pandey,<sup>2,3</sup> Subhasish Roy,<sup>4</sup> VeenaPande,<sup>1</sup> Anirban Dandapat<sup>5\*</sup>*

<sup>1</sup>Department of Biotechnology, Sir J. C. Bose Technical Campus, Bhimtal, Kumaun University, Nainital, Uttarakhand- 263136

<sup>2</sup>ICMR-National Institute of Malaria Research (NIMR), New Delhi, Delhi 110077

<sup>3</sup>Academic of Scientific and Innovative Research (AcSIR), Ghaziabad, India

<sup>4</sup>Department of chemistry, Birla Institute of Technology and science-Pilani, K K Birla Goa Campus, Goa 403726, India,

<sup>5</sup>University School of Automation and Robotics, Guru Gobind Singh Indraprastha University, East Delhi Campus, SurajmalVihar, Delhi-110092.

\*Corresponding author email: [dranirbandandapat@kunainital.ac.in](mailto:dranirbandandapat@kunainital.ac.in)

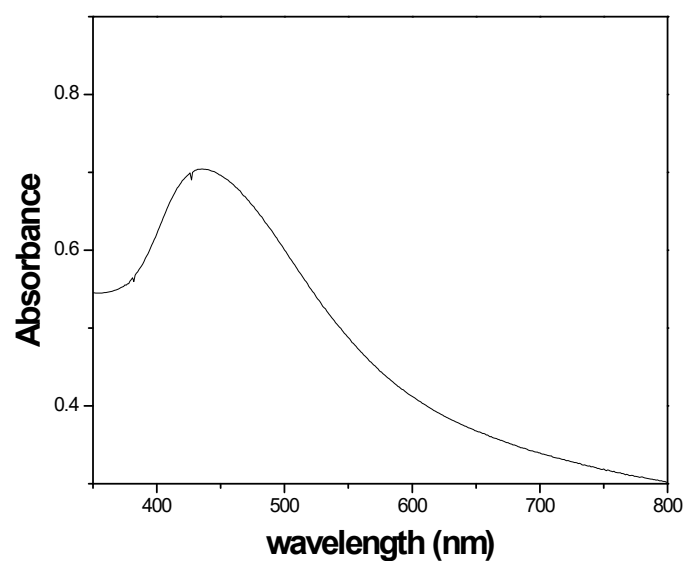

Fig. S1. UV-visible spectrum of the synthesized MT-AgNPs

Table 1: Comparative study of antibacterial activities synthesized from endophytic fungi

| Materials | Name of the endophytic fungi                              | Sizes of the NPs | Dose                    | Strains                                                                                                                                                                                  | Zone of inhibition (mm) | Ref. |
|-----------|-----------------------------------------------------------|------------------|-------------------------|------------------------------------------------------------------------------------------------------------------------------------------------------------------------------------------|-------------------------|------|
| Tp-AgNPs  | <i>Talaromyces purpureogenus</i>                          | <50 nm           | 75-100 $\mu\text{g/mL}$ | <i>S. aureus</i> and <i>B.cereus</i> ,<br><i>S. enterica</i> ,<br><i>P.aeruginosa</i> ,<br>and <i>E.coli</i>                                                                             | 9 to 13                 | 1    |
| AgNPs     | <i>Podosordaria muli</i> and<br><i>Xylaria feejeensis</i> | 15 to 25nm       | -                       | <i>Staphylococcus aureus</i> ,<br><i>Micrococcus luteus</i> ,<br><i>Salmonella Typhi</i> ,<br><i>Enterobacter aerogenes</i> ,<br><i>Serratia marcescens</i><br><i>Escherichia coli</i> . | 11 to 20                | 2    |
| POAgNPs   | <i>Penicillium</i>                                        | 15 to 19         | 50                      | <i>E. coli</i>                                                                                                                                                                           | 6.6                     | 3    |

|                         |                                       |            |              |                                                                                                                                                                |                    |              |
|-------------------------|---------------------------------------|------------|--------------|----------------------------------------------------------------------------------------------------------------------------------------------------------------|--------------------|--------------|
|                         | <i>oxalicum</i>                       | nm         | µg/mL        |                                                                                                                                                                |                    |              |
| AgNPs                   | <i>Alternaria sp.</i>                 | 4 to 30 nm | 5 µg/mL      | <i>Bacillus subtilis</i> ,<br><i>Staphylococcus aureus</i> ,<br><i>Escherichia coli</i><br><i>Serratia marcescens</i>                                          | 9<br>6<br>26<br>24 | 4            |
| AgNPs                   | <i>Aspergillus terreus</i> ,          | 16.54 nm   | 10-40 mg/mL  | <i>Salmonella typhi</i> ,<br><i>Staphylococcus aureus</i><br><i>Escherichia coli</i>                                                                           | 15 to 16           | 5            |
| MT-AgNPs (Present work) | <i>Colletotrichum gloeosporioides</i> | 13.5 nm    | 10-100 µg/mL | <i>Bacillus subtilis</i> ,<br><i>Pseudomonas aeruginosa</i> ,<br><i>Escherichia coli</i> ,<br><i>Klebsiella pneumoniae</i> and<br><i>Aeromonas salmonicida</i> | 10 to 14           | Present work |

## References:

1. X. Hu, K. Saravanakumar, T. Jin and H.M. Wang, Mycosynthesis, characterization, anticancer and antibacterial activity of silver nanoparticles from endophytic fungus *Talaromyces purpureogenus*. *International Journal of Nanomedicine*, 2019, 3427-3438.
2. V. Choong, L. O. G. Ai and T. K. Suan, Synthesis of silver nanoparticles mediated by endophytic fungi associated with orchids and its antibacterial activity. *Materials Today: Proceedings*, 2018, 5(10), 22093-22100.

3. P. Gupta, N. Rai, A. Verma, D. Saikia, P. S. Singh, R. Kumar and V. Gautam, Green-Based Approach to Synthesize Silver Nanoparticles Using the Fungal Endophyte *Penicillium oxalicum* and Their Antimicrobial, Antioxidant, and In Vitro Anticancer Potential. *ACS Omega*, 2022.
4. T. Singh, K. Jyoti, A. Patnaik, A. Singh, R. Chauhan and S.S. Chandel, Biosynthesis, characterization and antibacterial activity of silver nanoparticles using an endophytic fungal supernatant of *Raphanus sativus*. *Journal of Genetic Engineering and Biotechnology*, 2017, 15(1), 31-39.
5. R. Rani, D. Sharma, M. Chaturvedi, P. J. Yadav, Green synthesis, characterization and antibacterial activity of silver nanoparticles of endophytic fungi *Aspergillus terreus*. *Journal of Nanomedicine & Nanotechnology*, 2017, 8(4), 1000457.
